# Supplementary material for: Personalized visual encoding model construction with small data
Source: PubMed Central journal article supplement (PMC9759560; doi:10.1038/s42003-022-04347-z), 2022-12-17
Supplement: 42003_2022_4347_MOESM3_ESM.pdf [file 42003_2022_4347_MOESM3_ESM.pdf]

## Description of Additional Supplementary Files

**File name:** Supplementary Data 1

**Description:** The source data behind Figure 2.

**File name:** Supplementary Data 2

**Description:** The source data behind Figure 3.

**File name:** Supplementary Data 3

**Description:** The source data behind Figure 4.

**File name:** Supplementary Data 4

**Description:** The source data behind Figure 5.
