# Supplementary material for: Personalized visual encoding model construction with small data
Source: PubMed Central journal article supplement (PMC9759560; doi:10.1038/s42003-022-04347-z), 2022-12-17
Supplement: 42003_2022_4347_MOESM8_ESM.pdf [file 42003_2022_4347_MOESM8_ESM.pdf]

## Reporting Summary

Nature Portfolio wishes to improve the reproducibility of the work that we publish. This form provides structure for consistency and transparency in reporting. For further information on Nature Portfolio policies, see our [Editorial Policies](#) and the [Editorial Policy Checklist](#).

### Statistics

For all statistical analyses, confirm that the following items are present in the figure legend, table legend, main text, or Methods section.

- | n/a                                 | Confirmed                                                                                                                                                                                                                                                                                      |
|-------------------------------------|------------------------------------------------------------------------------------------------------------------------------------------------------------------------------------------------------------------------------------------------------------------------------------------------|
| <input type="checkbox"/>            | <input checked="" type="checkbox"/> The exact sample size ( $n$ ) for each experimental group/condition, given as a discrete number and unit of measurement                                                                                                                                    |
| <input type="checkbox"/>            | <input checked="" type="checkbox"/> A statement on whether measurements were taken from distinct samples or whether the same sample was measured repeatedly                                                                                                                                    |
| <input type="checkbox"/>            | <input checked="" type="checkbox"/> The statistical test(s) used AND whether they are one- or two-sided<br><i>Only common tests should be described solely by name; describe more complex techniques in the Methods section.</i>                                                               |
| <input checked="" type="checkbox"/> | <input type="checkbox"/> A description of all covariates tested                                                                                                                                                                                                                                |
| <input type="checkbox"/>            | <input checked="" type="checkbox"/> A description of any assumptions or corrections, such as tests of normality and adjustment for multiple comparisons                                                                                                                                        |
| <input type="checkbox"/>            | <input checked="" type="checkbox"/> A full description of the statistical parameters including central tendency (e.g. means) or other basic estimates (e.g. regression coefficient) AND variation (e.g. standard deviation) or associated estimates of uncertainty (e.g. confidence intervals) |
| <input type="checkbox"/>            | <input checked="" type="checkbox"/> For null hypothesis testing, the test statistic (e.g. $F$ , $t$ , $r$ ) with confidence intervals, effect sizes, degrees of freedom and $P$ value noted<br><i>Give <math>P</math> values as exact values whenever suitable.</i>                            |
| <input checked="" type="checkbox"/> | <input type="checkbox"/> For Bayesian analysis, information on the choice of priors and Markov chain Monte Carlo settings                                                                                                                                                                      |
| <input checked="" type="checkbox"/> | <input type="checkbox"/> For hierarchical and complex designs, identification of the appropriate level for tests and full reporting of outcomes                                                                                                                                                |
| <input type="checkbox"/>            | <input checked="" type="checkbox"/> Estimates of effect sizes (e.g. Cohen's $d$ , Pearson's $r$ ), indicating how they were calculated                                                                                                                                                         |

*Our web collection on [statistics for biologists](#) contains articles on many of the points above.*

### Software and code

Policy information about [availability of computer code](#)

Data collection

Data analysis

For manuscripts utilizing custom algorithms or software that are central to the research but not yet described in published literature, software must be made available to editors and reviewers. We strongly encourage code deposition in a community repository (e.g. GitHub). See the Nature Portfolio [guidelines for submitting code & software](#) for further information.

### Data

Policy information about [availability of data](#)

All manuscripts must include a [data availability statement](#). This statement should provide the following information, where applicable:

- Accession codes, unique identifiers, or web links for publicly available datasets
- A description of any restrictions on data availability
- For clinical datasets or third party data, please ensure that the statement adheres to our [policy](#)

## Human research participants

Policy information about [studies involving human research participants and Sex and Gender in Research](#).

|                             |                                                                                                                                                                                                                    |
|-----------------------------|--------------------------------------------------------------------------------------------------------------------------------------------------------------------------------------------------------------------|
| Reporting on sex and gender | Natural Scene Dataset: 6 females, 2 males,<br>NeuroGen Dataset: 5 females, 1 male<br>Sex or gender is not relevant to this study so not considered in the study design and are determined based on self-reporting. |
| Population characteristics  | Natural Scene Dataset: age 19-32 years<br>NeuroGen Dataset: age 19-25 years<br>All participants are young healthy adults.                                                                                          |
| Recruitment                 | Participants were recruited by sending out flyers around the campus and should not contain bias.                                                                                                                   |
| Ethics oversight            | Institutional Review Board for Human Participant Research                                                                                                                                                          |

Note that full information on the approval of the study protocol must also be provided in the manuscript.

## Field-specific reporting

Please select the one below that is the best fit for your research. If you are not sure, read the appropriate sections before making your selection.

Life sciences       Behavioural & social sciences       Ecological, evolutionary & environmental sciences

For a reference copy of the document with all sections, see [nature.com/documents/nr-reporting-summary-flat.pdf](https://www.nature.com/documents/nr-reporting-summary-flat.pdf)

## Life sciences study design

All studies must disclose on these points even when the disclosure is negative.

|                 |                                                                                            |
|-----------------|--------------------------------------------------------------------------------------------|
| Sample size     | The sample size (nnumber of subject) for Natural Scene Dataset is 8 and for NeuroGen is 6. |
| Data exclusions | No data were excluded from the analysis.                                                   |
| Replication     | Replications across subjects and datasets were successful.                                 |
| Randomization   | For models trained with small data, we randomly selected samples with a random seed.       |
| Blinding        | Blinding is not relevant to this study since we didn't do group analysis.                  |

## Reporting for specific materials, systems and methods

We require information from authors about some types of materials, experimental systems and methods used in many studies. Here, indicate whether each material, system or method listed is relevant to your study. If you are not sure if a list item applies to your research, read the appropriate section before selecting a response.

### Materials & experimental systems

|                                     |                                                        |
|-------------------------------------|--------------------------------------------------------|
| n/a                                 | Included in the study                                  |
| <input checked="" type="checkbox"/> | <input type="checkbox"/> Antibodies                    |
| <input checked="" type="checkbox"/> | <input type="checkbox"/> Eukaryotic cell lines         |
| <input checked="" type="checkbox"/> | <input type="checkbox"/> Palaeontology and archaeology |
| <input checked="" type="checkbox"/> | <input type="checkbox"/> Animals and other organisms   |
| <input checked="" type="checkbox"/> | <input type="checkbox"/> Clinical data                 |
| <input checked="" type="checkbox"/> | <input type="checkbox"/> Dual use research of concern  |

### Methods

|                                     |                                                            |
|-------------------------------------|------------------------------------------------------------|
| n/a                                 | Included in the study                                      |
| <input checked="" type="checkbox"/> | <input type="checkbox"/> ChIP-seq                          |
| <input checked="" type="checkbox"/> | <input type="checkbox"/> Flow cytometry                    |
| <input type="checkbox"/>            | <input checked="" type="checkbox"/> MRI-based neuroimaging |

## Magnetic resonance imaging

### Experimental design

|             |                     |
|-------------|---------------------|
| Design type | Task functional MRI |
|-------------|---------------------|

|                                 |                                                                                                                                                                                                                                                                                                                                                                                                                                                                                                                                                                                                                                                                                                                                                                                                                                    |
|---------------------------------|------------------------------------------------------------------------------------------------------------------------------------------------------------------------------------------------------------------------------------------------------------------------------------------------------------------------------------------------------------------------------------------------------------------------------------------------------------------------------------------------------------------------------------------------------------------------------------------------------------------------------------------------------------------------------------------------------------------------------------------------------------------------------------------------------------------------------------|
| Design specifications           | The NeuroGen dataset (the novel dataset in this paper, the Natural Scenes Dataset is described elsewhere in full detail) contains MRI data from 6 individuals that consists of two scans about 4 months apart. The task functional MRI collected during both sessions consisted of viewing a series of images that were square cropped and resized to 8.4° x 8.4°. All sessions had the following organization: 3 second inter-stimulus interval, with 2 seconds on, 1 second off. Stimuli were organized into blocks with 8 unique images per block and 1 one-back repeat per block, so 9 stimuli per block = 27 seconds per block. There was a 6 second rest between blocks. Session 1 had 10 runs with 12 blocks each while session 2 had 7 runs with 12 blocks each. A custom PsychoPy script was used to present the stimuli. |
| Behavioral performance measures | Participants were asked to perform an image recognition task (1-back) to encourage maintenance of attention. No statistics were used to quantify whether the task was performed as expected.                                                                                                                                                                                                                                                                                                                                                                                                                                                                                                                                                                                                                                       |

## Acquisition

|                               |                                                                                                                      |
|-------------------------------|----------------------------------------------------------------------------------------------------------------------|
| Imaging type(s)               | functional MRI, anatomical MRI                                                                                       |
| Field strength                | 3T                                                                                                                   |
| Sequence & imaging parameters | gradient-echo EPI, 2.25x2.25x3.00mm, 27 interleaved slices, TR=1.45s, TE=32ms, session-encoding in the A»P direction |
| Area of acquisition           | fMRI scans had posterior oblique-axial slices oriented to capture early visual areas and the ventral visual stream   |
| Diffusion MRI                 | <input type="checkbox"/> Used <input checked="" type="checkbox"/> Not used                                           |

## Preprocessing

|                            |                                                                                                                                                                                                                                                                                                                                                                                                                                                  |
|----------------------------|--------------------------------------------------------------------------------------------------------------------------------------------------------------------------------------------------------------------------------------------------------------------------------------------------------------------------------------------------------------------------------------------------------------------------------------------------|
| Preprocessing software     | Preprocessing was done using custom bash and python scripts using FSL tools for motion correction and coregistration, and custom python scripts for slice time correction and temporal upsampling                                                                                                                                                                                                                                                |
| Normalization              | Data were not normalized as we were interested in the individuals' brain responses at a regional level and not group level analysis of voxel-wise data                                                                                                                                                                                                                                                                                           |
| Normalization template     | Data were not normalized                                                                                                                                                                                                                                                                                                                                                                                                                         |
| Noise and artifact removal | EPI susceptibility distortion was estimated using pairs of spin-echo scans with reversed session-encoding directions. Preprocessing included slice-timing correction with upsampling to 1 second TR, followed by a single-step spatial interpolation combining motion, distortion, and resampling to 2mm isotropic voxels.                                                                                                                       |
| Volume censoring           | There was no explicit volume censoring. The single-trial responses were estimated using GLMsingle ( <a href="https://www.biorxiv.org/content/10.1101/2022.01.31.478431v1">https://www.biorxiv.org/content/10.1101/2022.01.31.478431v1</a> , <a href="https://github.com/cvnlab/GLMsingle">https://github.com/cvnlab/GLMsingle</a> ), which constructs data-driven nuisance regressors along with motion time courses to denoise and fit the data |

## Statistical modeling & inference

|                                                                        |                                                                                                                                                                                                                                                                                                                                                                                                                                                                                                                                                                                                                                                                                                                                                                      |
|------------------------------------------------------------------------|----------------------------------------------------------------------------------------------------------------------------------------------------------------------------------------------------------------------------------------------------------------------------------------------------------------------------------------------------------------------------------------------------------------------------------------------------------------------------------------------------------------------------------------------------------------------------------------------------------------------------------------------------------------------------------------------------------------------------------------------------------------------|
| Model type and settings                                                | A Generalized Linear Model (GLM) was used to quantify brain activity in response to image presentation. Then the single-trial beta weights representing the voxel-wise response to the image presented was estimated using a GLM. There are three steps for the GLM: the first is to estimate the voxel-specific hemodynamic response functions (HRFs); the second is to apply the GLMdenoise technique to the single-trial GLM framework; and the third is to use an efficient ridge regression to regularize and improve the accuracy of the beta weights, which represent activation in response to the image. FreeSurfer was used to reconstruct the cortical surface, and both volume- and surface-based versions of the voxel-wise response maps were created. |
| Effect(s) tested                                                       | The regional activation level in response to image presentation                                                                                                                                                                                                                                                                                                                                                                                                                                                                                                                                                                                                                                                                                                      |
| Specify type of analysis:                                              | <input type="checkbox"/> Whole brain <input checked="" type="checkbox"/> ROI-based <input type="checkbox"/> Both                                                                                                                                                                                                                                                                                                                                                                                                                                                                                                                                                                                                                                                     |
| Anatomical location(s)                                                 | The functional localizer (fLoc) data was used to create contrast maps (voxel-wise t-statistics) of responses to specific object categories, and region boundaries were then manually drawn on inflated surface maps by identifying contiguous regions of high contrast in the expected cortical location, and thresholding to include all vertices with contrast > 0 within that boundary. Early visual ROIs were defined manually using retinotopic mapping data on the cortical surface. Surface-defined regions were projected back to fill in voxels within the gray matter ribbon.                                                                                                                                                                              |
| Statistic type for inference (See <a href="#">Eklund et al. 2016</a> ) | Region-wise image responses were then calculated by averaging the voxel-wise beta response maps over all voxels within a given region.                                                                                                                                                                                                                                                                                                                                                                                                                                                                                                                                                                                                                               |
| Correction                                                             | We used false discovery rate correction to adjust for multiple comparisons.                                                                                                                                                                                                                                                                                                                                                                                                                                                                                                                                                                                                                                                                                          |

## Models & analysis

- n/a | Involved in the study
- Functional and/or effective connectivity
  - Graph analysis
  - Multivariate modeling or predictive analysis

### Multivariate modeling and predictive analysis

We used a neural network to predict regional brain activity in response to an image. The image features were extracted using the feature extractor from ResNet-50, and then reduced via max-pooling. Then a linear layer was followed to map the features to the brain regional response. The models were trained on individual-specific data and tested on the shared data.
